# Supplementary material for: Designing Nutritionally Adequate and Climate-Friendly Diets for Omnivorous, Pescatarian, Vegetarian and Vegan Adolescents in Sweden Using Linear Optimization
Source: MDPI journal article supplement (doi:10.3390/nu13082507), 2021-07-22
Supplement: s1 [file s1]

**Table S2.** Nutrient coverage for baseline intake and optimized solutions. Unless indicated otherwise, all nutrient values represent the relative coverage (%) of the recommended values.

|                                    | Unit       | Baseline <sup>a</sup> | Omni <sup>b</sup> | Omni <sup>b</sup> | Pesc <sup>+b</sup> | Veg <sup>+b</sup> | Plant <sup>b</sup> |
|------------------------------------|------------|-----------------------|-------------------|-------------------|--------------------|-------------------|--------------------|
| CO <sub>2eq.</sub> average per day | g          | 4481                  | 2729              | 1571              | 1571               | 1571              | 1211               |
|                                    | change (%) | na                    | -39               | -65               | -65                | -65               | -73                |
| Cost average per day               | SEK        | 77.2                  | 60.71             | 61.73             | 51.43              | 59.40             | 57.28              |
|                                    | change (%) | na                    | -21               | -20               | -33                | -23               | -26                |
| ARD                                | (%)        | na                    | 12.8              | 21.1              | 31.4               | 73.0              | 118.0              |
| Carbohydrates                      | Lower      | 104                   | 118               | 120               | 122                | 117               | 132                |
|                                    | Upper      | 78                    | 88                | 90                | 91                 | 88                | 99                 |
| Fat                                | Lower      | 135                   | 120               | 120               | 116                | 114               | 101                |
|                                    | Upper      | 85                    | 75                | 75                | 72                 | 72                | 63                 |
| Protein                            | Lower      | 171                   | 143               | 130               | 128                | 137               | 105                |
| Fiber                              | Lower      | <b>90</b>             | 107               | 126               | 133                | 212               | 202                |
| Saturated fatty acids              | Upper      | <b>135</b>            | <b>100</b>        | <b>100</b>        | 98                 | 96                | 59                 |
| Monounsaturated fatty acids        | Lower      | 131                   | 121               | 120               | 112                | 107               | <b>100</b>         |
| Poly unsaturated fatty acids       | Lower      | <b>89</b>             | <b>100</b>        | <b>100</b>        | <b>100</b>         | <b>100</b>        | 132                |
| Vitamin A                          | RI         | 108                   | 101               | <b>100</b>        | <b>100</b>         | 111               | <b>100</b>         |
| Vitamin D                          | RI         | <b>83</b>             | <b>100</b>        | <b>100</b>        | <b>100</b>         | <b>100</b>        | <b>100</b>         |
| Vitamin E                          | RI         | 154                   | 176               | 183               | 177                | 200               | 258                |
| Thiamine                           | RI         | 137                   | 145               | 144               | 150                | 198               | 366                |
| Riboflavin                         | RI         | 145                   | 133               | 133               | 142                | 190               | 314                |
| Vitamin C                          | RI         | 149                   | 186               | 150               | 130                | 125               | 324                |
| Niacin                             | RI         | 148                   | 147               | 132               | 119                | 118               | 256                |
| Vitamin B6                         | RI         | 179                   | 190               | 187               | 177                | 187               | 447                |
| Vitamin B12                        | RI         | 287                   | 236               | 234               | 213                | 178               | 127                |
| Folate                             | RI         | 119                   | 125               | 124               | 129                | 199               | 291                |
| Phosphor                           | RI         | 265                   | 236               | 232               | 230                | 283               | 229                |
| Iodine                             | RI         | 153                   | <b>100</b>        | 114               | 106                | 106               | 107                |
| Iron                               | RI         | <b>89</b>             | <b>100</b>        | <b>100</b>        | <b>100</b>         | <b>100</b>        | <b>100</b>         |
| Calcium                            | RI         | 134                   | <b>100</b>        | <b>100</b>        | <b>100</b>         | 116               | 104                |
| Potassium                          | RI         | 104                   | 107               | 109               | 103                | 117               | 160                |
| Magnesium                          | RI         | 114                   | 120               | 129               | 131                | 199               | 153                |
| Sodium                             | Upper      | <b>157</b>            | <b>100</b>        | <b>100</b>        | <b>100</b>         | <b>100</b>        | <b>100</b>         |
| Selenium                           | RI         | 112                   | <b>100</b>        | <b>100</b>        | <b>100</b>         | <b>100</b>        | <b>100</b>         |
| Zink                               | RI         | 146                   | 117               | 105               | 106                | 156               | 103                |
| Added sugars                       | Upper      | 84                    | <b>100</b>        | 94                | 86                 | 68                | 40                 |

<sup>a</sup>Numbers in bold highlight the nutrients which did not meet the dietary reference values in the baseline diet.

<sup>b</sup>Numbers in bold are the model's active constraints in the optimized diets.

ARD = Average Relative Deviation
