# Supplementary material for: Designing Nutritionally Adequate and Climate-Friendly Diets for Omnivorous, Pescatarian, Vegetarian and Vegan Adolescents in Sweden Using Linear Optimization
Source: MDPI journal article supplement (doi:10.3390/nu13082507), 2021-07-22
Supplement: s1 [file s1]

**Table S1.** Dietary reference values applied as constraints in the linear programming models.

|                            | Unit | Lower limit | Upper limit |
|----------------------------|------|-------------|-------------|
| Energy <sup>a,b</sup>      | kcal | 2410        |             |
| Carbohydrates <sup>a</sup> | g    | 271         | 361.0       |
| Fat <sup>a</sup>           | g    | 66.9        | 107.0       |
| Protein <sup>a</sup>       | g    | 60.3        | 120.5       |
| Fiber <sup>a</sup>         | g    | 26.0        |             |
| SFA <sup>a</sup>           | g    |             | 26.8        |
| MUFA <sup>a</sup>          | g    | 26.8        | 53.6        |
| PUFA <sup>a</sup>          | g    | 13.4        | 26.8        |
| Vitamin A <sup>b</sup>     | µg   | 726         |             |
| Vitamin E <sup>b</sup>     | mg   | 8.4         |             |
| Tiamine <sup>b</sup>       | mg   | 1.2         |             |
| Riboflavine <sup>b</sup>   | mg   | 1.4         |             |
| Vitamin C <sup>b</sup>     | mg   | 66.7        |             |
| Niacin <sup>b</sup>        | mg   | 16.2        |             |
| B6 <sup>b</sup>            | mg   | 1.3         |             |
| B12 <sup>a</sup>           | µg   | 2.0         |             |
| Folate <sup>b</sup>        | µg   | 285         |             |
| Phosphora                  | mg   | 668         |             |
| Iodine                     | µg   | 150         |             |
| Iron <sup>b</sup>          | mg   | 12.2        |             |
| Calcium <sup>a</sup>       | mg   | 868         |             |
| Potassium <sup>b</sup>     | mg   | 3.2         |             |
| Magnesium <sup>b</sup>     | mg   | 301         |             |
| Sodium                     | mg   |             | 6.0         |
| Selenium <sup>b</sup>      | µg   | 49.6        |             |
| Zink <sup>b</sup>          | mg   | 9.2         |             |
| Added sugars               | g    |             | 60.3        |

<sup>a</sup>Adjusted for age differences, with 34% of pupils in grade 5, 34% in grade 8 and 32% in grade 11.

<sup>b</sup>Adjusted for age and sex differences with 55% females and 45% males.
