# Supplementary material for: Designing Nutritionally Adequate and Climate-Friendly Diets for Omnivorous, Pescatarian, Vegetarian and Vegan Adolescents in Sweden Using Linear Optimization
Source: MDPI journal article supplement (doi:10.3390/nu13082507), 2021-07-22
Supplement: s1 [file s1]

**Table S4.** Quantities of food groups for the optimized vegetarian diet generating a maximum of 1571 grams of CO<sub>2</sub>eq, based on the “Veg+”-model.

- About 220 g of (whole grain) bread and up to 270 g of other cereals (rice, pasta, etc.) per day
- At least 100 g of pulses per day
- At least 80 g potatoes per day
- Approximately 230 g of vegetables per day around one fruit (~60 g) per day
- About two eggs per day
- Two small portions of meat substitutes (220 g) and one small portion of (fortified) dairy substitutes (~100 g)
- Not more than 500 g of dairy products per day and about two slices of cheese (15 g) per week
- A large handful of nuts & seeds per week (~50 g)
